# Supplementary material for: rTMS Induced Tinnitus Relief Is Related to an Increase in Auditory Cortical Alpha Activity
Source: PubMed Central journal article supplement (PMC3563643; doi:10.1371/journal.pone.0055557), 2013-02-04
Supplement: pone.0055557.s001.pdf [file pone.0055557.s001.pdf]

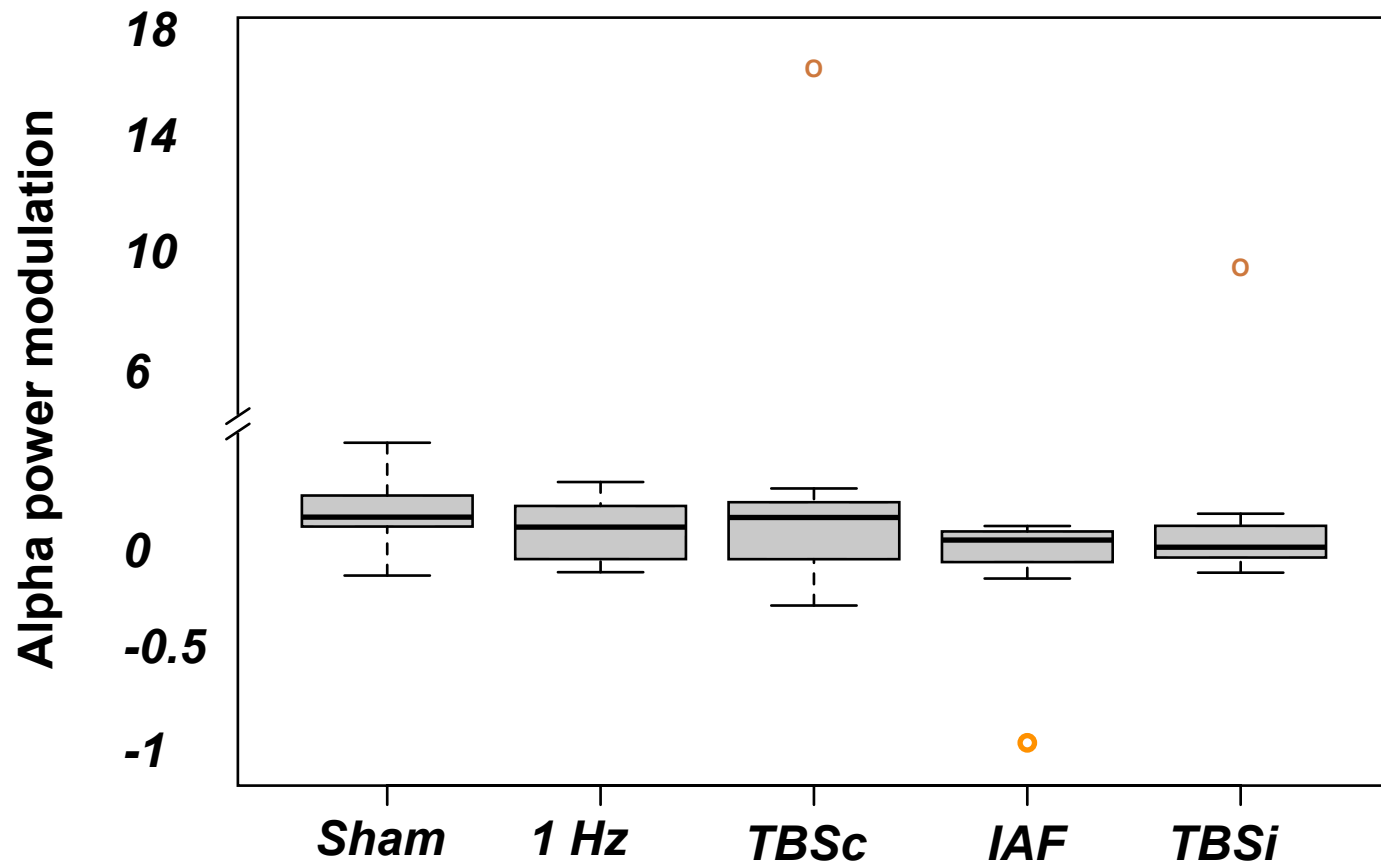

**Boxplot distribution for the different TMS protocols**

○ symbol for outliers

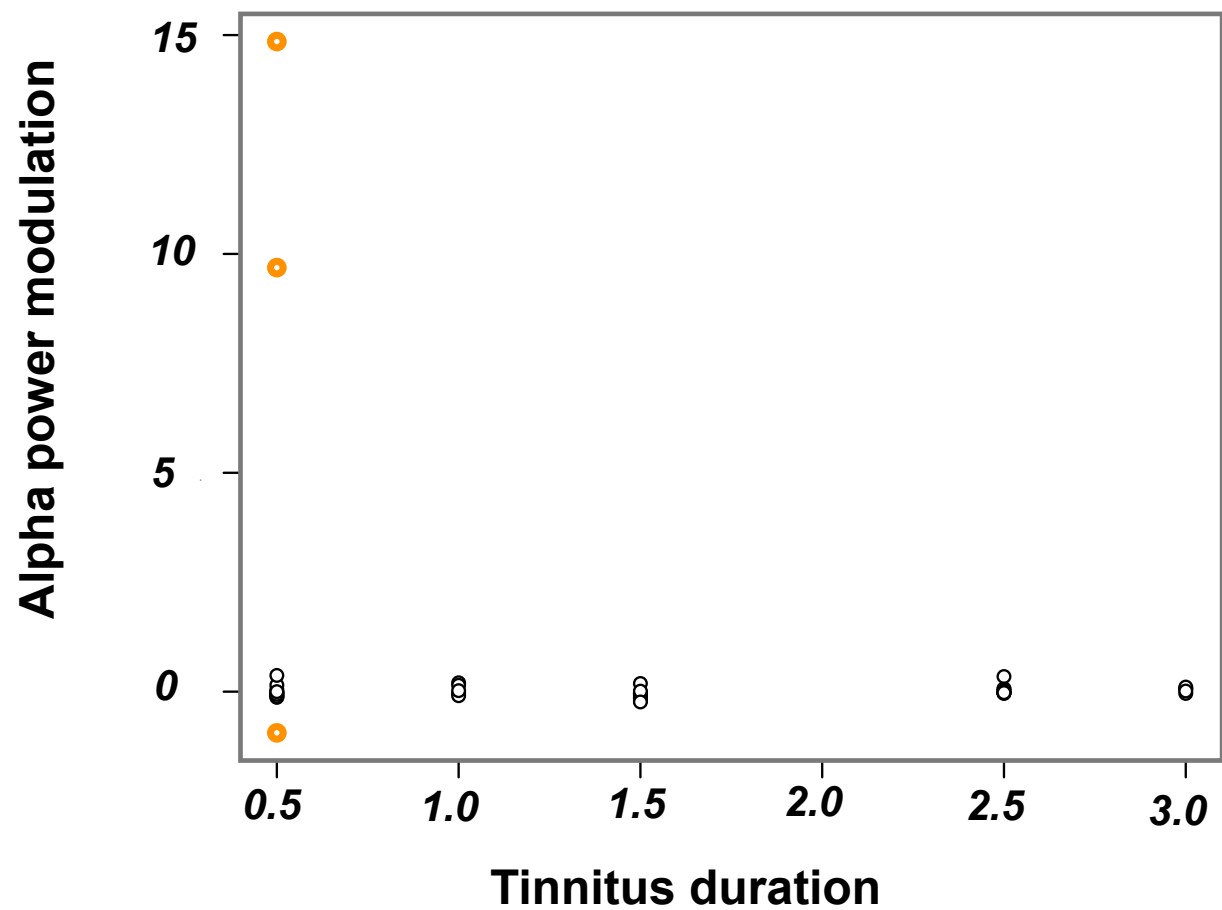

**Relation between tinnitus duration and alpha power modulation**
