# Supplementary material for: rTMS Induced Tinnitus Relief Is Related to an Increase in Auditory Cortical Alpha Activity
Source: PubMed Central journal article supplement (PMC3563643; doi:10.1371/journal.pone.0055557), 2013-02-04

### Delta power modulation (1-3 Hz)

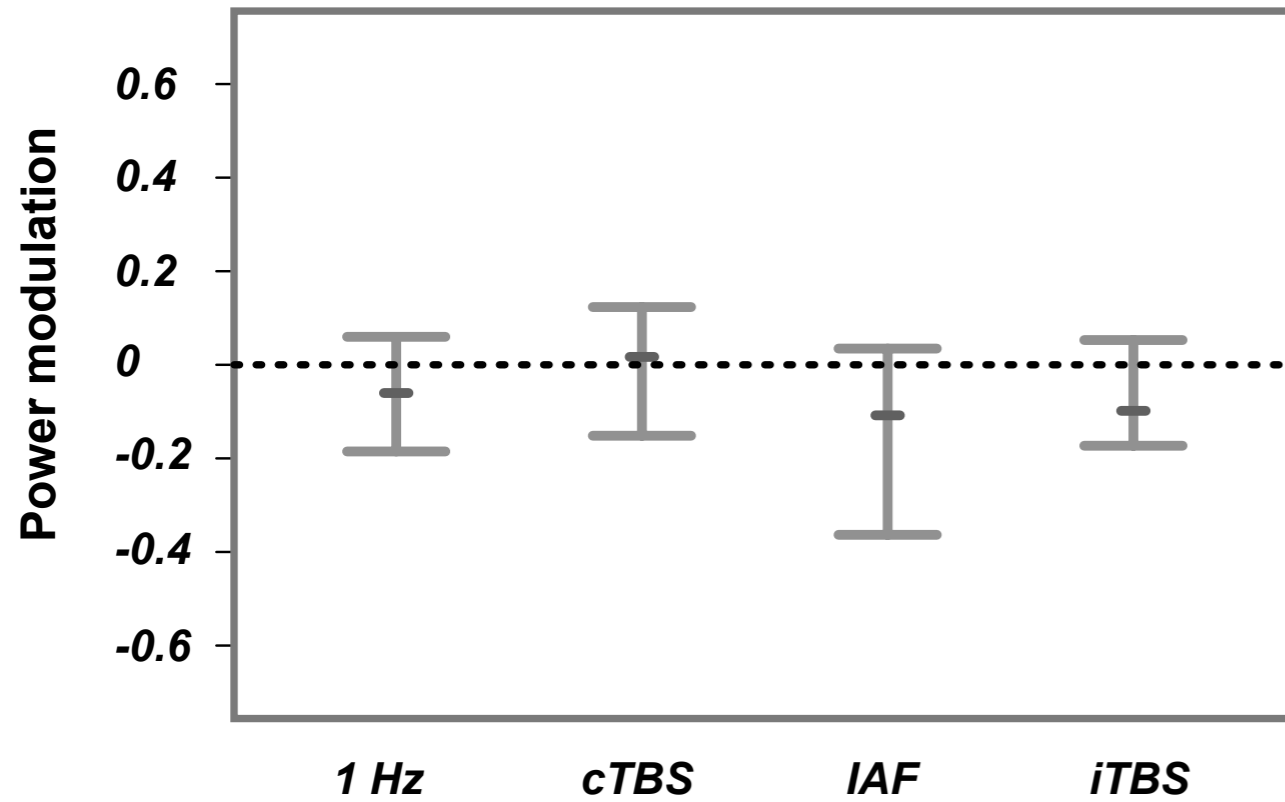

### Theta power modulation (4-6 Hz)

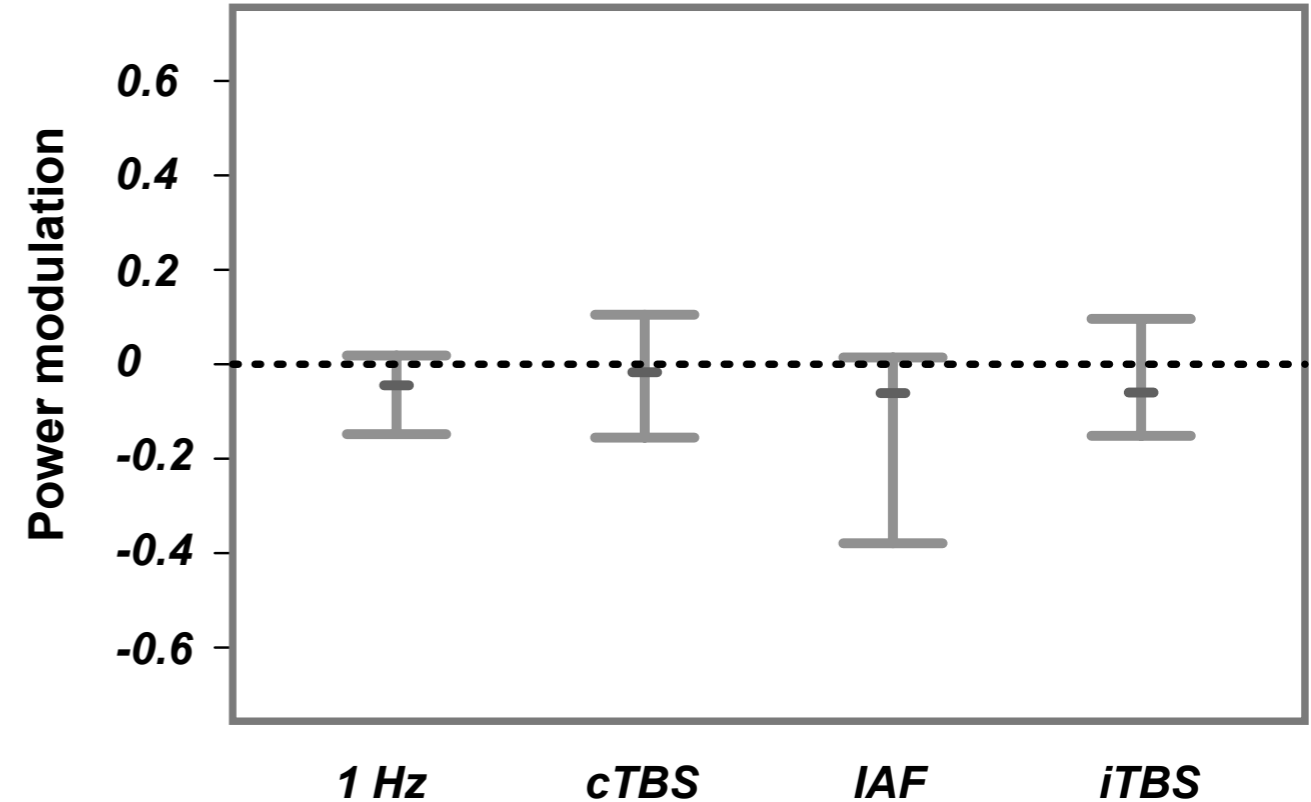

### Low gamma power modulation (30-70 Hz)

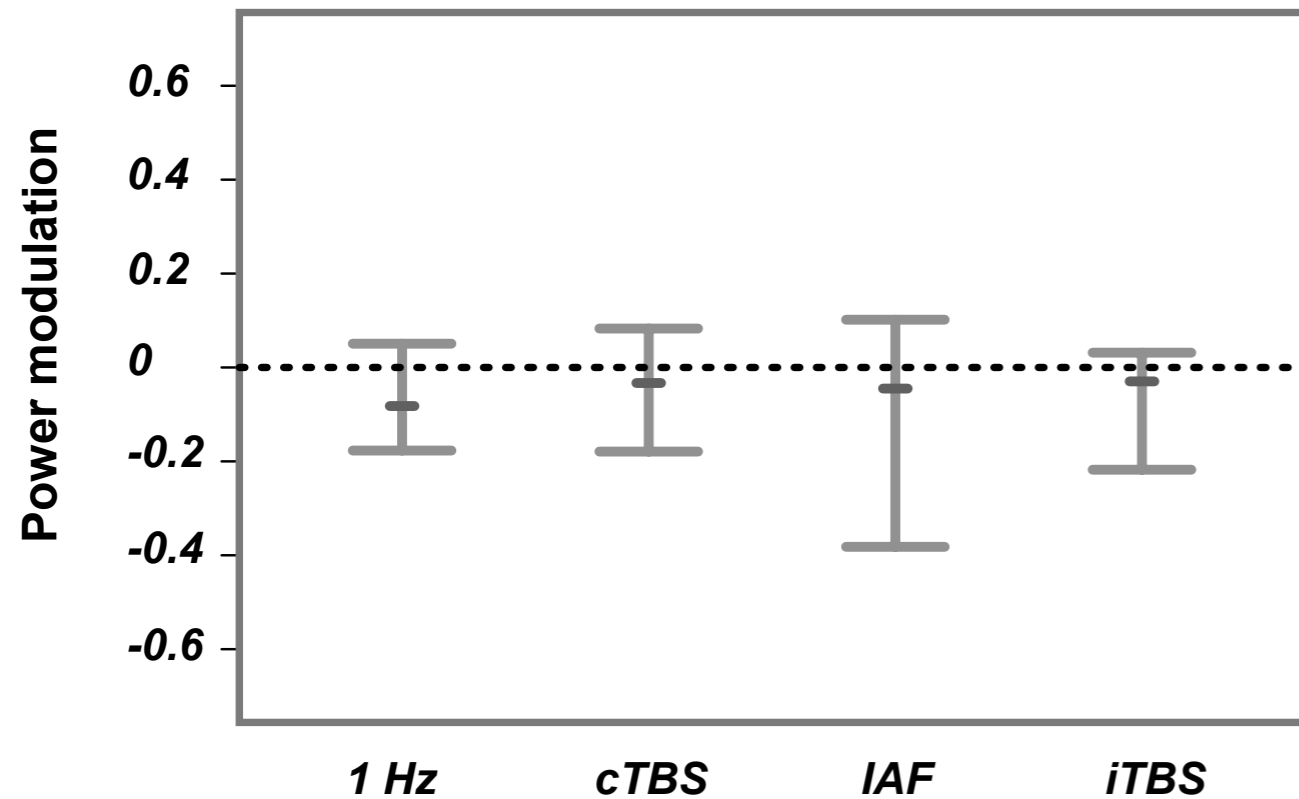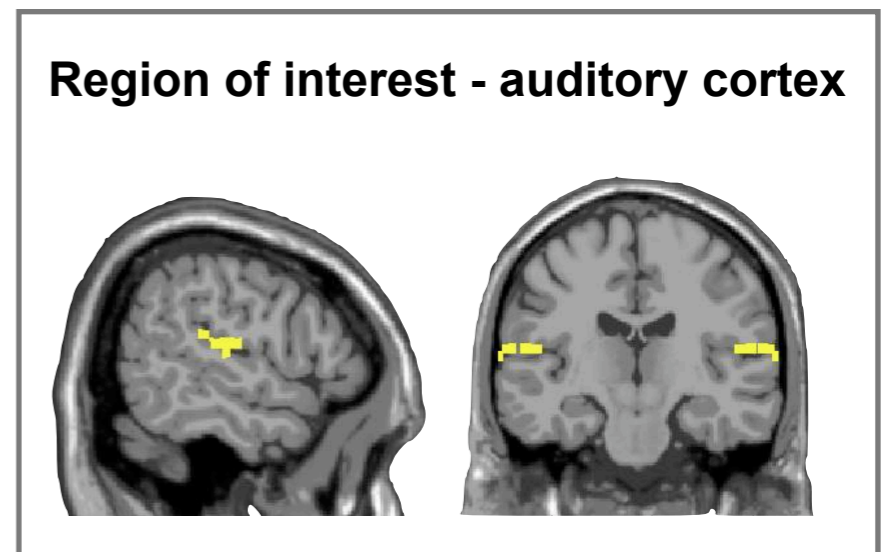

Supplement: pone.0055557.s002.pdf [file pone.0055557.s002.pdf]
